# Supplementary material
Source: MDPI journal article supplement (https://www.mdpi.com/2409-515X/9/4/65)
Supplement: s1 [file s1]

# Current strategies for collecting missed cases\*

**Only one reply by region or country**

Filled in by ..... Position .....

Date ..... / ..... / .....

Country/Region: .....

☐ National CF-NBS programme      ☐ Regional CF-NBS programme

---

## 1. For how many years have you collected data on missed cases in your country/region?

☐ 2 years      ☐ 3 years      ☐ 4 years      ☐ 5-9 years      ☐ ≥ 10 years

## 2. Strategies to identify missed cases in **2023** (*More than one answer is possible*)

- ☐ Annual questionnaire by the national/regional coordinator or structure
  - ☐ sent to the head of paediatric CF centres
  - ☐ sent to the regional screening centre
  - ☐ sent to the screening laboratory
- ☐ Paediatric CF centre fills in an assessment sheet when a child is clinically diagnosed having CF
  - ☐ sent to the regional/national coordinator
  - ☐ sent to the regional/national screening laboratory
- ☐ Regular meetings for reporting missed cases (at least annually) between CF physicians and the national/regional coordinator
- ☐ CF registry (national or European)
- ☐ Unknown strategy
- ☐ Other: .....

## 3. Which structure is in place to ensure collection of completed questionnaires (incl. reminders)?

- ☐ Centralized coordinator or structure at national level
- ☐ Centralized coordinator or structure at regional level
- ☐ No structure (no centralised coordination)
- ☐ Unknown
- ☐ Other: .....

---

\* defined as all missed cases, consisting

1. NBS protocol related (→ analytical issues)
2. Not NBS protocol related (→ pre- and post-analytical issues)

**4. Did the strategy collecting missed cases change in the last few years (since the EU survey for 2019 data)?**

- ☐ no
- ☐ yes: How did this change? .....
- ☐ Unknown

**5. Are the missed cases reported in your programme?**

- ☐ no
- ☐ yes

**6. If they are reported, are the missed cases classified based on the criteria below?**

- |                                                |                              |                             |                                  |
|------------------------------------------------|------------------------------|-----------------------------|----------------------------------|
| a) Diagnosed based on symptoms                 | <input type="checkbox"/> yes | <input type="checkbox"/> no | <input type="checkbox"/> unknown |
| b) Meconium ileus (with normal IRT)            | <input type="checkbox"/> yes | <input type="checkbox"/> no | <input type="checkbox"/> unknown |
| c) Antenatal diagnosis (with normal IRT)       | <input type="checkbox"/> yes | <input type="checkbox"/> no | <input type="checkbox"/> unknown |
| d) Exposure to CFTR modulator during pregnancy | <input type="checkbox"/> yes | <input type="checkbox"/> no | <input type="checkbox"/> unknown |

**7. How many years after birth maybe needed to identify the majority (≥80%) of missed cases in your country/region?**

- ☐ 2 years      ☐ 3 years      ☐ 4 years      ☐ 5-9 years      ☐ ≥ 10 years

**8. What percentage of missed cases is currently collected in 2023 in your country/region?**

- ☐ ≥80%      ☐ 60-79%      ☐ 40-59%      ☐ ≤40%      ☐ no idea

If <80% what are the reasons for missing data in your region/country:

.....

**9. Are you able to collect these items at diagnosis for all identified missed cases?**

- |                                            |                              |                             |                                  |                                                   |
|--------------------------------------------|------------------------------|-----------------------------|----------------------------------|---------------------------------------------------|
| • <u>Date of birth</u> (month/year)        | <input type="checkbox"/> yes | <input type="checkbox"/> no | <input type="checkbox"/> unknown | <input type="checkbox"/> not permitted to collect |
| • <u>Date of CF diagnosis</u> (month/year) | <input type="checkbox"/> yes | <input type="checkbox"/> no | <input type="checkbox"/> unknown | <input type="checkbox"/> not permitted to collect |
| • <u>IRT-1 / PAP-values:</u>               | <input type="checkbox"/> yes | <input type="checkbox"/> no | <input type="checkbox"/> unknown | <input type="checkbox"/> not permitted to collect |
| • <u>IRT-2 / safety net:</u>               | <input type="checkbox"/> yes | <input type="checkbox"/> no | <input type="checkbox"/> unknown | <input type="checkbox"/> not permitted to collect |
| • <u>Sweat test result:</u>                | <input type="checkbox"/> yes | <input type="checkbox"/> no | <input type="checkbox"/> unknown | <input type="checkbox"/> not permitted to collect |
| • <u>Genotype (CFTR mutation):</u>         | <input type="checkbox"/> yes | <input type="checkbox"/> no | <input type="checkbox"/> unknown | <input type="checkbox"/> not permitted to collect |
| • <u>Exocrine pancreatic status:</u>       | <input type="checkbox"/> yes | <input type="checkbox"/> no | <input type="checkbox"/> unknown | <input type="checkbox"/> not permitted to collect |

- Symptoms & family history (*More than one answer is possible*)

|                                                             | YES | NO | unknown |
|-------------------------------------------------------------|-----|----|---------|
| 1. Familial CF case                                         |     |    |         |
| 2. Respiratory symptoms                                     |     |    |         |
| 3. Gastrointestinal symptoms                                |     |    |         |
| 4. Failure to thrive                                        |     |    |         |
| 5. Rectal prolapse                                          |     |    |         |
| 6. Dehydration                                              |     |    |         |
| 7. Liver disease                                            |     |    |         |
| 8. Nasal polyps                                             |     |    |         |
| 9. Other: provide the list with all other recorded symptoms |     |    |         |
| Unknown circumstances                                       |     |    |         |

- Sample collection and/or Laboratory problems

|                                                                                                                   | YES | NO | unknown |
|-------------------------------------------------------------------------------------------------------------------|-----|----|---------|
| <b>Sample collection</b>                                                                                          |     |    |         |
| 1. Dry blood spot (DBS) sample is not obtained or lost                                                            |     |    |         |
| 2. DBS sample labelling error in the neonatal nursery                                                             |     |    |         |
| 3. DBS sample mix-up                                                                                              |     |    |         |
| 4. DBS sample quality is unacceptable                                                                             |     |    |         |
| 5. DBS taken on wrong day (too early/too late)                                                                    |     |    |         |
| 6. Mother taken Elexacaftor-Tezacaftor-Ivacaftor (ETI) during pregnancy (not reported)                            |     |    |         |
| <b>In the laboratory</b>                                                                                          |     |    |         |
| 5. First IRT (IRT-1) or IRT-1/PAP values above cut offs are not actioned                                          |     |    |         |
| 6. Infant's IRT-1 or IRT-1/PAP level is below the cut off                                                         |     |    |         |
| 7. In IRT/IRT protocol: A 2 <sup>nd</sup> specimen is not obtained, no follow-up                                  |     |    |         |
| 8. In IRT/IRT protocol: The second IRT (IRT-2) is below the cut off                                               |     |    |         |
| 9. In IRT/DNA protocol: Variants not in the panel                                                                 |     |    |         |
| 10. In IRT/DNA protocol: Failure in DNA analysis                                                                  |     |    |         |
| 11. In IRT/DNA protocol: No detected variant and initial IRT-1 is below the ultrahigh cut-off for next step IRT-2 |     |    |         |

|                                                                                                        |  |  |  |
|--------------------------------------------------------------------------------------------------------|--|--|--|
| 12. In IRT/DNA protocol: no detected variant and ultrahigh IRT-1, next step IRT-2 is below the cut-off |  |  |  |
| 13. Administrative error in reporting the NBS result to the CF team/primary care provider/family       |  |  |  |

• Communication problems & diagnostic issues

| Follow-up                                                                                                                                                                 | YES | NO | unknown |
|---------------------------------------------------------------------------------------------------------------------------------------------------------------------------|-----|----|---------|
| 14. Miscommunication of NBS result between primary care provider and family (e.g., sweat test not performed, family not reachable, not responding or not willing to come) |     |    |         |
| 15. Error in measurement of sweat chloride concentration (SCC)                                                                                                            |     |    |         |
| 16. Appropriate cut-off values of SCC are not used                                                                                                                        |     |    |         |
| 17. SCC is normal after detection of only one variant (in IRT/DNA protocol)                                                                                               |     |    |         |

**10. Would you agree to complete a more detailed questionnaire for all missed cases born in 2019 for your region/country?**

☐ yes      ☐ no      if no, why: .....

**11. What are the main challenges to collecting data on missed cases in your programme?**

☐ .....
